## Tubulin-folding cofactor E deficiency is associated with vascular dysfunction and endoplasmic reticulum stress of vascular smooth muscle cells

P. Efentakis<sup>1</sup>, M. Molitor<sup>2</sup>, S. Kossmann<sup>2</sup>, M. Bochenek<sup>2</sup>, J. Wild<sup>2</sup>, J. Lagrange<sup>2</sup>, S. Finger<sup>2</sup>, R. Jung<sup>2</sup>, S. Karbach<sup>2</sup>, K. Schaefer<sup>2</sup>, A. Schulz<sup>2</sup>, P. Wild<sup>2</sup>, T. Muenzel<sup>2</sup>, P. Wenzel<sup>2</sup>

<sup>1</sup>National & Kapodistrian University of Athens, Pharmacy, Athens, Greece; <sup>2</sup>Johannes Gutenberg University Mainz (JGU), Department of Cardiology, Mainz, Germany

**Funding Acknowledgement:** Type of funding sources: Foundation. Main funding source(s): This work was supported by grants of the German Federal Ministry for Education and Research (BMBF01EO1003 and BMBF01EO1503), the DFG Major Research Instrumentation Programme (DFG INST 371/47-1 FUGG) as well as the Boehringer Ingelheim Foundation. PW received funds from the German Research Foundation in support of his work (DFG WE4361-4-1 and WE 4361/7-1). KS, TM and PW are PIs of the DZHK.

**Introduction:** Endothelial function assessed via flow mediated dilatation (FMD) has shown to predict risk in individuals with established cardiovascular diseases, whereas its predictive value is uncertain in the setting primary prevention.

**Purpose:** The aim of the current work was to discover and evaluate novel mediators of vascular dysfunction in the general population and in conditional knock-out transgenic animal models.

**Methods:** In order to identify novel targets that were negatively correlated with FMD and investigate their contribution in vascular function, a Genome Wide Association Study (GWAS) of 5,000 participants was performed and subsequently immune cell-, endothelial- and vascular smooth muscle cell (VSMCs)-targeted conditional knockout mouse models were generated and characterized.

**Results:** GWAS analysis revealed that single nucleotide polymorphisms (SNPs) in the tubulin folding cofactor E (TBCE) gene were negatively correlated with FMD and TBCE expression in the peripheral blood mononuclear cells (PBMCs). Myelomonocytic cell-targeted TBCE deficiency did

not lead to any vascular dysfunction in vivo in the LysM+Cre+/-TBCEfl/fl mice. Endothelial-targeted TBCE deficiency led to an NLR family pyrin domain containing 3 (NLRP3)-dependent activation of the inflammasome in the endothelial cells of Tie2-ERT2Cre+/-TBCEfl/fl mice. Importantly, VSMC-targeted TBCE deficiency was associated with endothelial dysfunction, increased aortic wall thickness and endoplasmic reticulum (ER) stress-mediated VSMC hyperproliferation in vivo (SMMHC-ERT2Cre+/-TBCEfl/fl), paralleled by calnexin upregulation. Administration of the blood pressure hormone angiotensin II exacerbated the vascular dysfunction and phenotype. Administration of the ER stress modulator tauroursodeoxycholic acid to the SMMHC-ERT2Cre+/-TBCEfl/fl mice reversed vascular dysfunction, paralleled by induction of Raptor/Beclin-1-dependent autophagy both in vitro and in vivo.

**Conclusion:** TBCE and tubulin homeostasis in the vascular musculature seem to be novel markers of vascular function and represent a new drugable target for the treatment of ER-stress-mediated vascular dysfunction.
